# Supplementary material
Source: PubMed Central journal article supplement (PMC3989625)
Supplement: embj0033-0418-sd2.pdf [file embj0033-0418-sd2.pdf]

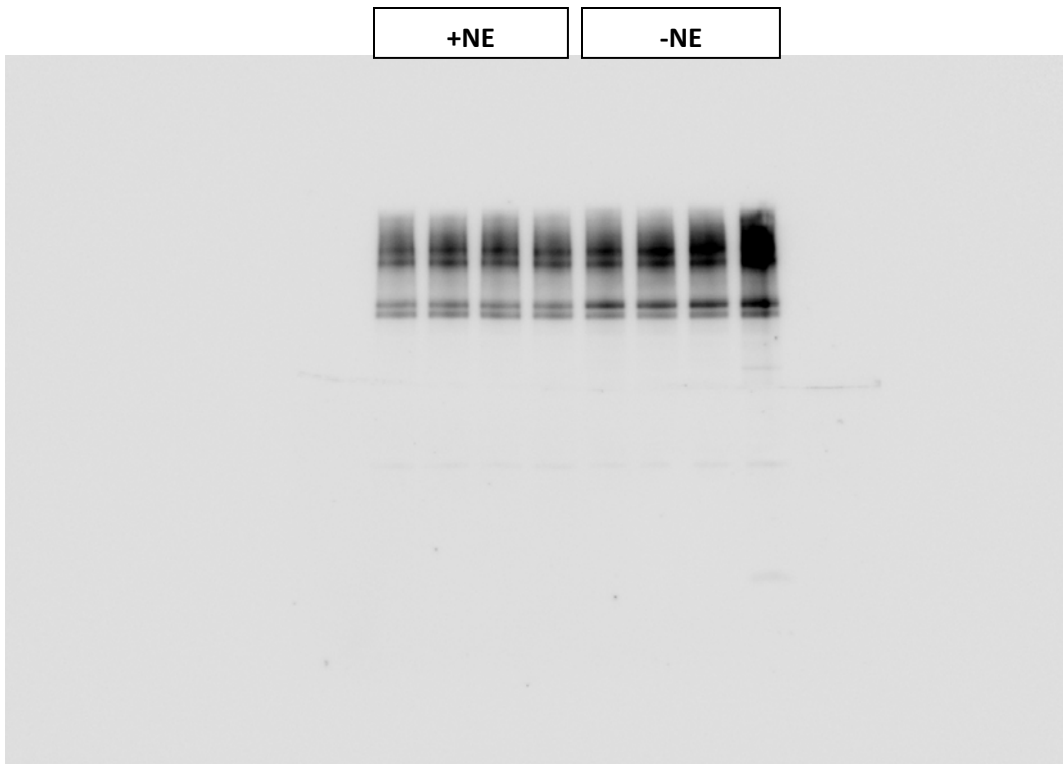

The original WB of the **Opa1** +/- NE

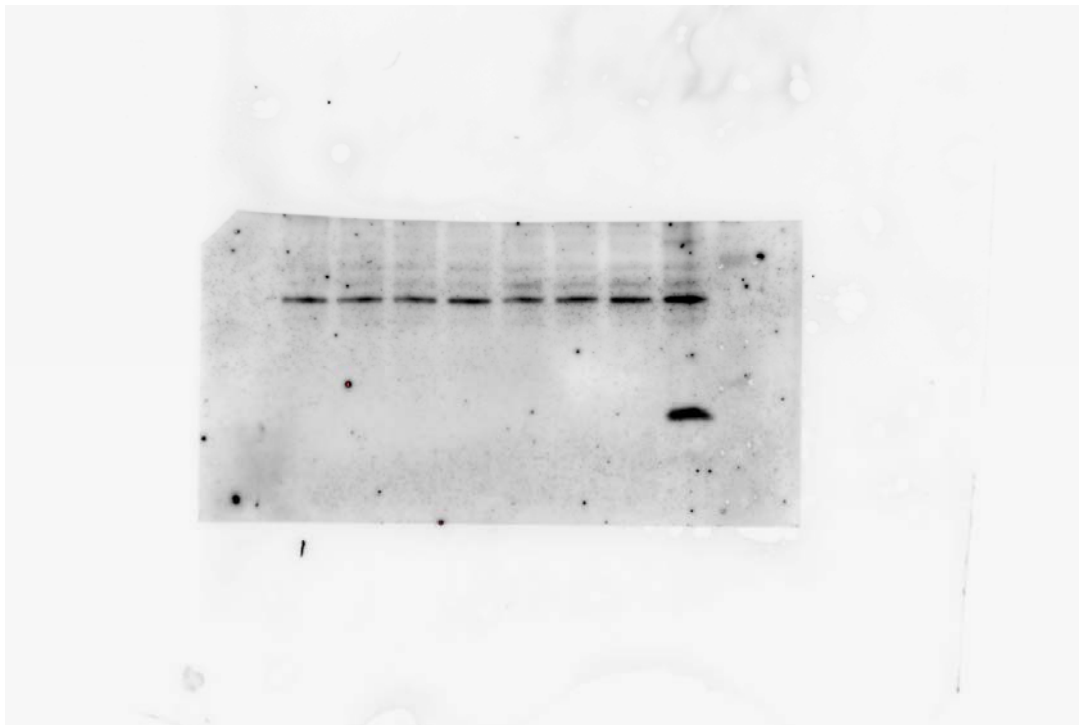

The original WB of the **Porin** +/- NE
