# Supplementary material
Source: PubMed Central journal article supplement (PMC3989625)
Supplement: embj0033-0418-sd3.pdf [file embj0033-0418-sd3.pdf]

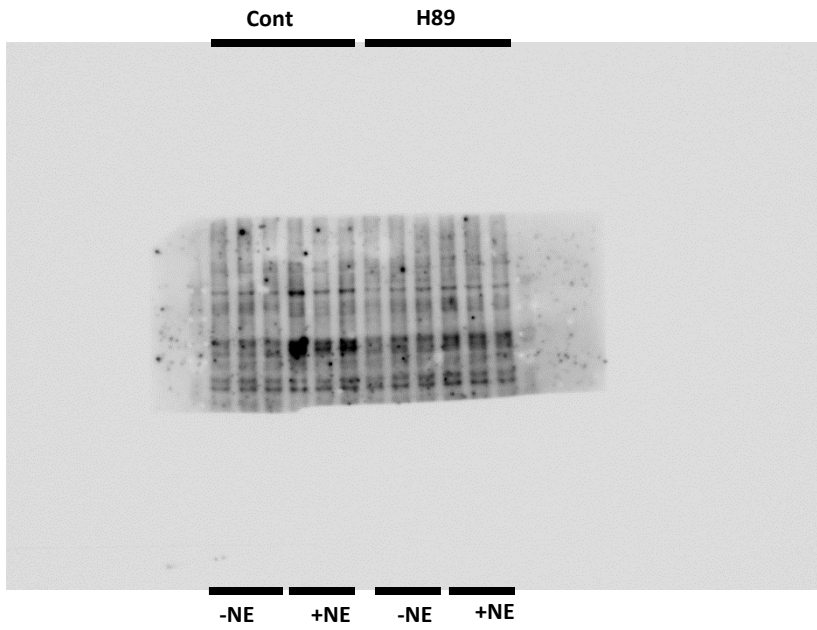

The original WB of the **p-Drp1(Ser600)** +/- NE and +/- H89

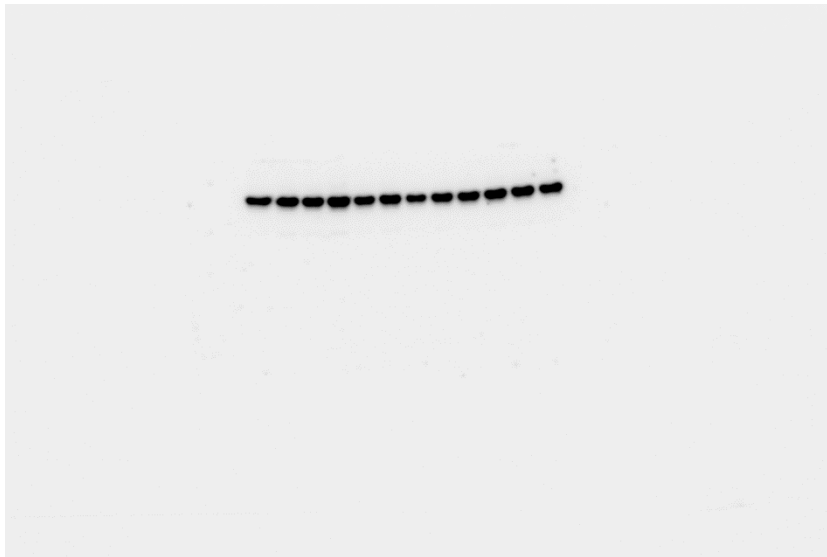

The original WB of the **Porin** +/- NE and +/- H89
