# Supplementary material
Source: PubMed Central journal article supplement (PMC3989625)
Supplement: embj0033-0418-sd4.pdf [file embj0033-0418-sd4.pdf]

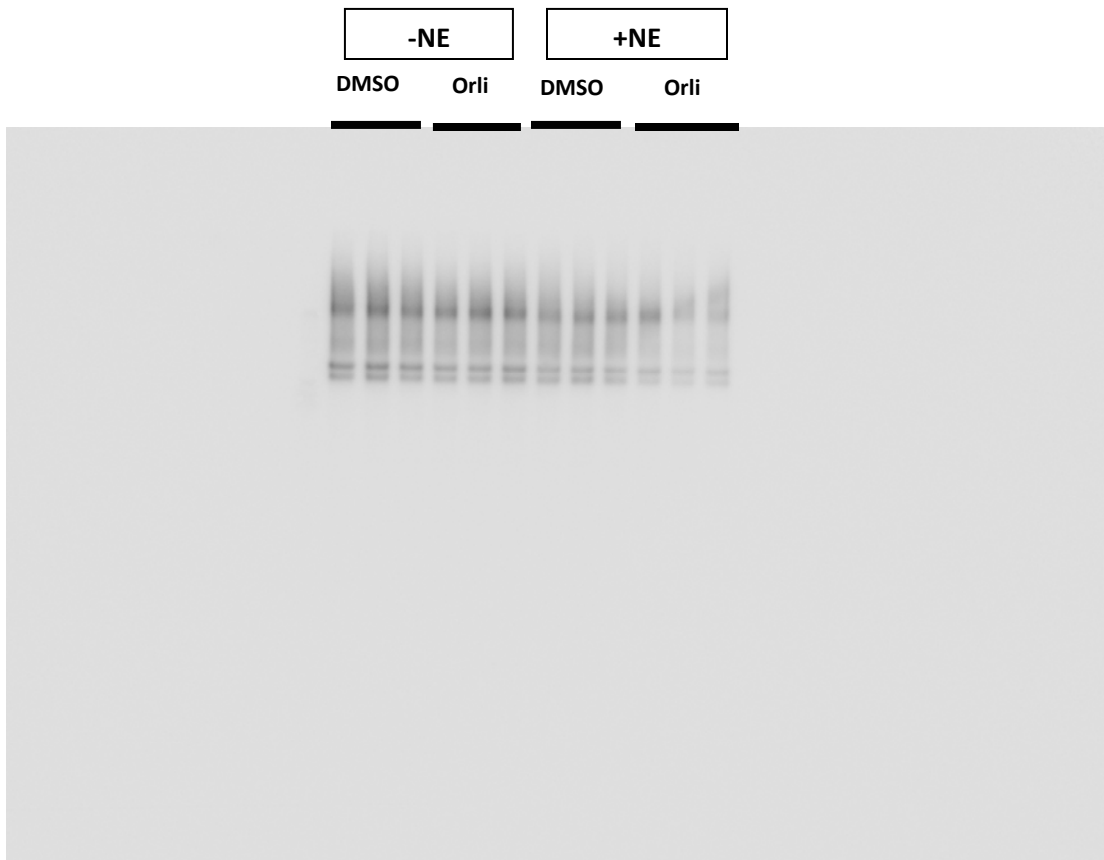

The original WB of the **Opa1** +/- NE and +/- orlistat

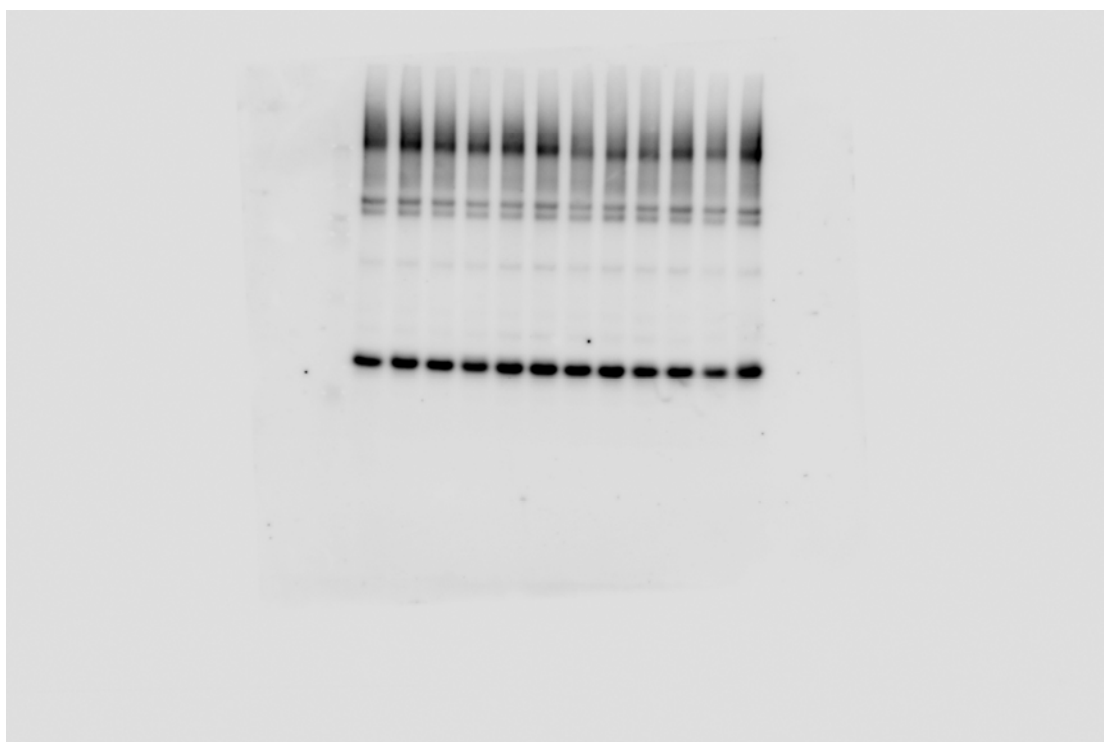

The original WB of the **Porin** +/- NE and +/- Orlistat
