# Supplementary material
Source: PubMed Central journal article supplement (PMC3989625)
Supplement: embj0033-0418-sd5.pdf [file embj0033-0418-sd5.pdf]

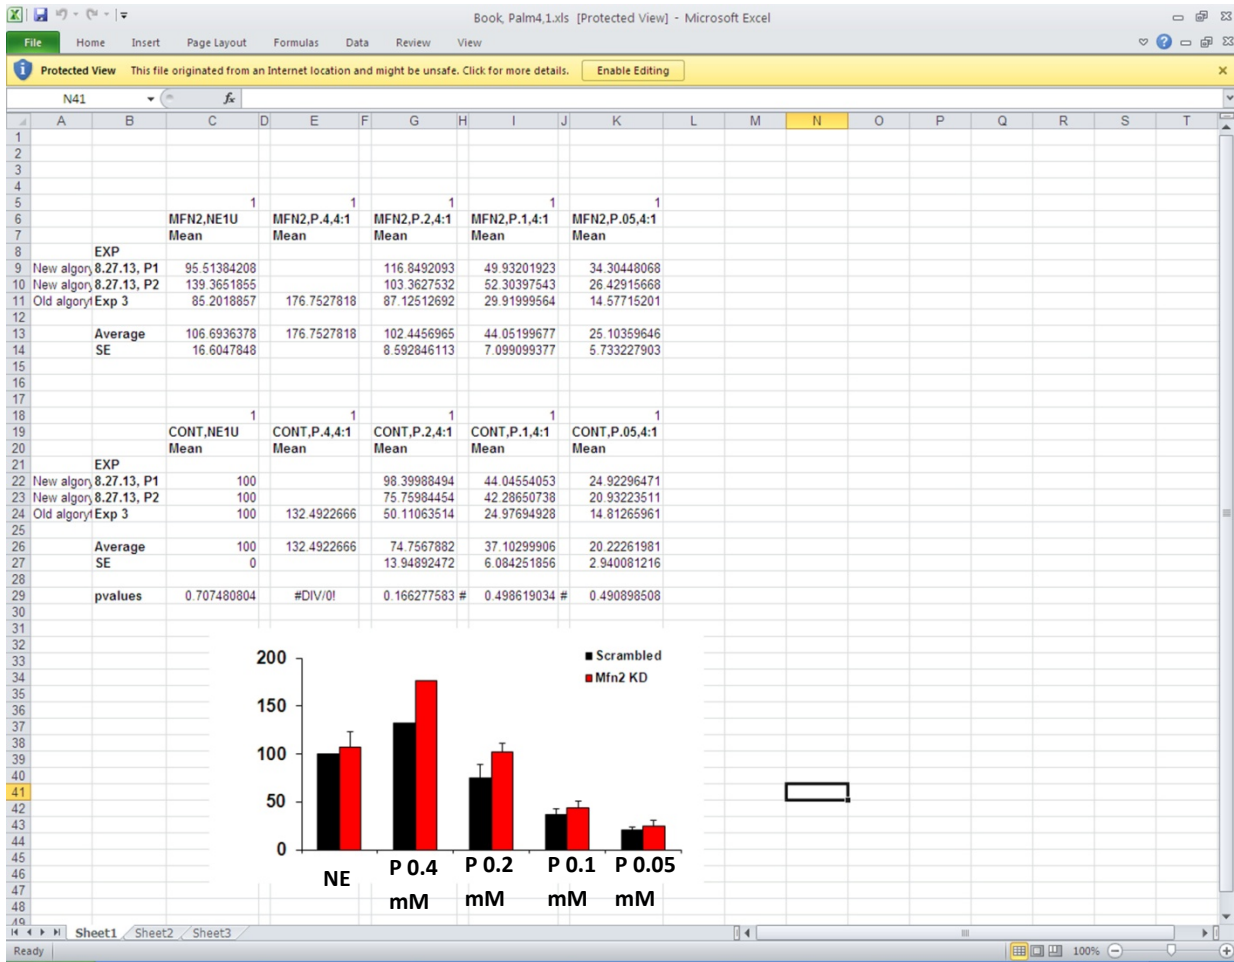

Original excel file data of the 3 independent seahorse experiments of the FFA titration on Mfn2KD/Control.
