# Supplementary material
Source: PubMed Central journal article supplement (PMC3989625)
Supplement: embj0033-0418-sd6.pdf [file embj0033-0418-sd6.pdf]

**Figure 1s**

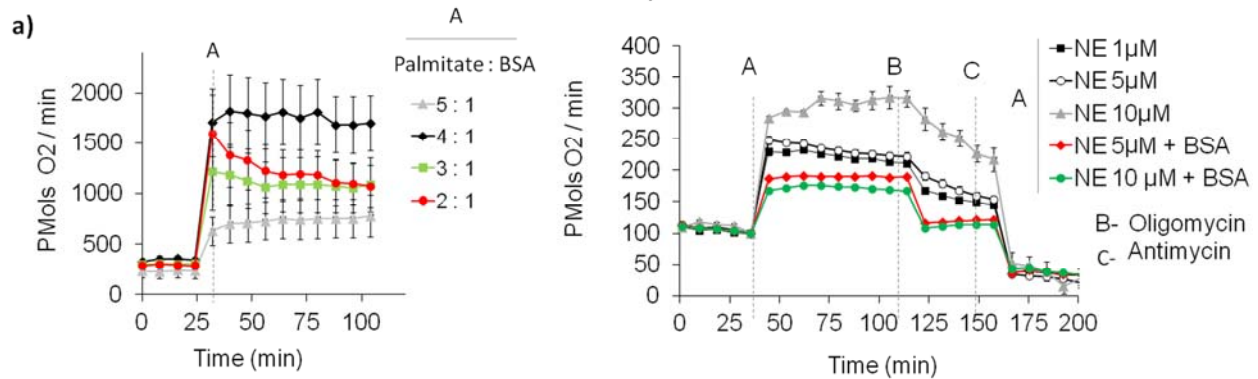

**Supplementary Figure 1. Establishment of conditions that demonstrate the synergistic effect of NE and FFA.**

A) BSA concentration alters palmitate effect. Palmitate (0.4mM) was complexed to BSA in four different ratios (Palmitate:BSA; 5:1, 4:1, 3:1, 2:1) and added together with NE. Note that the Palmitate:BSA ratio used in the study was 4:1.

B) Norepinephrine titration. Note that the concentration of NE used in the study, 1 μM, induce submaximal increase in oxygen consumption. In addition, adding BSA to NE inhibits the stimulated increase in oxygen consumption, indicating that intracellular concentrations of FFA are not saturating.
