# Supplementary material
Source: PubMed Central journal article supplement (PMC3989625)
Supplement: embj0033-0418-sd9.pdf [file embj0033-0418-sd9.pdf]

**Figure 4s**

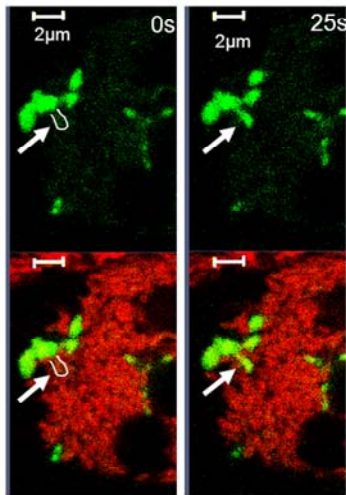

**Supplementary Figure 4. Mitochondrial fusion event.**

A) Cell expressing  $_{mt}$ DsRed and  $_{mt}$ PAGFP that was photoactivated prior to time-lapse imaging. Images are 3D projections from z-stacks to ensure that no mitochondrial segment moved out of the focal plane. Note the sudden increase in  $_{mt}$ PAGFP area at 25 s which represents a fusion event where  $_{mt}$ PAGFP is shared with another mitochondrion (white arrow). Scale bar 2 $\mu$ m.
