# Supplementary material
Source: PubMed Central journal article supplement (PMC3989625)
Supplement: embj0033-0418-sd10.pdf [file embj0033-0418-sd10.pdf]

**Figure 5s**

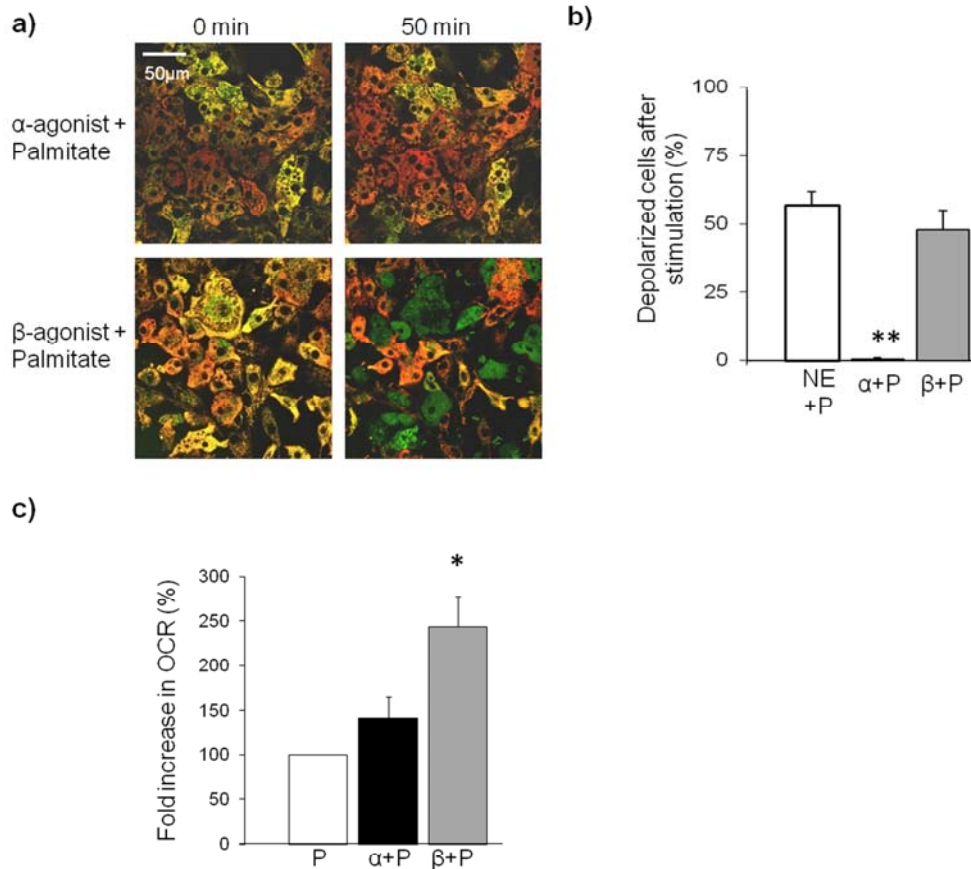

**Supplementary Figure 5. Synergistic effect on  $\Delta\psi_m$  depolarization is mediated through  $\beta$ -adrenergic pathway.**

A) Images of multiple cells stained with TMRE/MTG and imaged 50 min after stimulation as indicated (only merged images are shown). Alpha-agonist = cirazoline (selective  $\alpha_1$  agonist); Beta-agonist = CL-316243 (selective  $\beta_3$  agonist). Cells that depolarize lose red TMRE staining and become green. Scale bar 50 $\mu$ m.

B) Quantification of the fraction of cells that undergo  $\Delta\psi_m$  depolarization in response to stimuli as indicated. n=24 (NE + palmitate), n=10 (cirazoline + palmitate [ $\alpha$ +P]), n=10 (CL-316243 + palmitate [ $\beta$ +P]). \*\* p<0.01. C) Synergistic increase in oxygen consumption by FFA plus NE involves the  $\beta$ -adrenergic pathway. Measurements of basal oxygen consumption rates were followed by measurements under palmitate +/- CL-316243 or cirazoline. Note that data are normalized to Palmitate. N=4 (cirazoline [ $\alpha$ +P]), n=3 (CL-316243 [ $\beta$ +P]). \* p<0.05.
