# Supplementary material
Source: PubMed Central journal article supplement (PMC3989625)
Supplement: embj0033-0418-sd12.pdf [file embj0033-0418-sd12.pdf]

**Fig 7s**

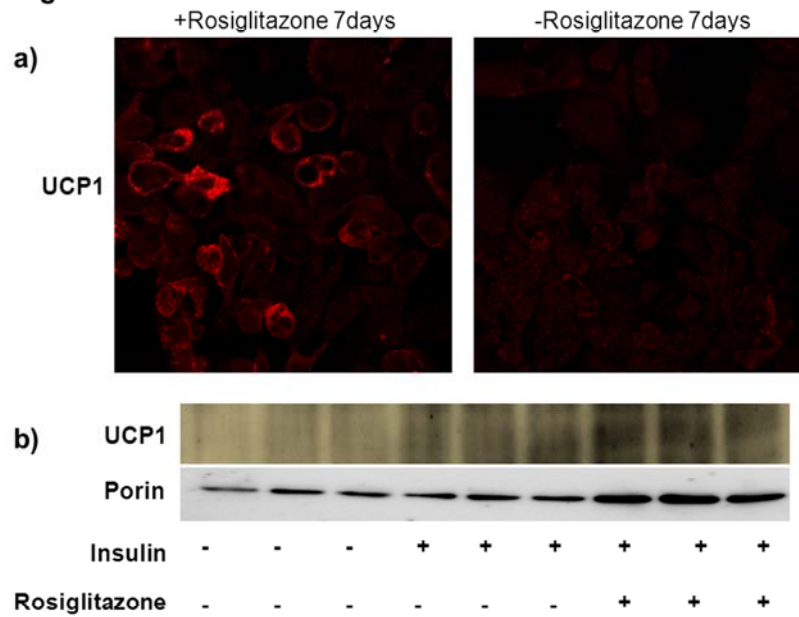

**Supplementary Figure 7.**

A) Ucp1 immunostaining of differentiated (with rosiglitazone) vs. undifferentiated cells (no rosiglitazone). Note the difference in fluorescence intensity.

B) Western blot for UCP1 and porin in differentiated brown adipocytes in the presence and absence of insulin and rosiglitazone.
